# Supplementary material
Source: MDPI journal article supplement (https://www.mdpi.com/1424-8247/14/10/949)
Supplement: s1 [file s1]

## Supplementary information

### Activity of New Synthetic (2-Chloroethylthio)-1,4-Naphthoquinones in Prostate Cancer Cells

Sergey A. Dyshlovoy<sup>1,2,3,#,\*</sup>, Dmitry N. Pelageev<sup>3,4,#</sup>, Lea S. Jakob<sup>1</sup>, Ksenia L. Borisova<sup>4</sup>, Jessica Hauschild<sup>1</sup>, Tobias Busenbender<sup>1</sup>, Moritz Kaune<sup>1</sup>, Ekaterina A. Khmelevskaya<sup>3,4</sup>, Markus Graefen<sup>2</sup>, Carsten Bokemeyer<sup>1</sup>, Victor Ph. Anufriev<sup>4</sup>, Gunhild von Amsberg<sup>1,2</sup>

<sup>1</sup> Laboratory of Experimental Oncology, Department of Oncology, Hematology and Bone Marrow Transplantation with Section Pneumology, Hubertus Wald-Tumorzentrum, University Medical Center Hamburg-Eppendorf, Martinistrasse 52, 20251 Hamburg, Germany; s.dyshlovoy@uke.de (S.A.D.), lea.jakob@stud.uke.uni-hamburg.de (L.S.J.), j.hauschild@uke.de (J.H.), tobias.busenbender@stud.uke.uni-hamburg.de (T.B.), moritz.kaune@stud.uke.uni-hamburg.de (M.K.), c.bokemeyer@uke.de (C.B.), g.von-amsberg@uke.de (G.v.A.)

<sup>2</sup> Martini-Klinik, Prostate Cancer Center, University Hospital Hamburg-Eppendorf, Martinistrasse 52, 20251 Hamburg, Germany; graefen@martini-klinik.de (M.G.)

<sup>3</sup> School of Natural Sciences, Far Eastern Federal University, FEPU Campus, Ajax Bay 10, Russky Island, 690922 Vladivostok, Russian Federation

<sup>4</sup> G.B. Elyakov Pacific Institute of Bioorganic Chemistry, Far-East Branch, Russian Academy of Sciences, 690022 Vladivostok, Russian Federation; pelageev@mail.ru (D.N.P.), borisovaksenia@mail.ru (K.L.B.), khea-96@mail.ru (E.A.Kh.), anufriev@piboc.dvo.ru (V.Ph.A.)

# These authors contributed equally

\* Correspondence: dyshlovoy@gmail.com; s.dyshlovoy@uke.de; Tel.: +49 40 7410 51950.

|                                                                                                      |           |
|------------------------------------------------------------------------------------------------------|-----------|
| <b>CHEMISTRY</b> .....                                                                               | <b>1</b>  |
| Table S1.1. Starting compounds used for the synthesis.....                                           | <b>1</b>  |
| Table S1.2. Synthesized compounds. ....                                                              | <b>3</b>  |
| Table S1.3. Synthesized compounds. ....                                                              | <b>6</b>  |
| Table S1.4. Synthesized compounds. ....                                                              | <b>7</b>  |
| <b>BIOLOGY</b> .....                                                                                 | <b>13</b> |
| Cell culture conditions .....                                                                        | <b>13</b> |
| Figure S1. Effects of 30 and 32 on cell viability in combination with platinum or taxane agents..... | <b>13</b> |
| Table S2. Molar ratios of the individual drugs used for drug combinational studies.....              | <b>14</b> |

#### CHEMISTRY

Table S1.1. Starting compounds used for the synthesis

| No | Formula | Spectral Information, References, Notes |
|----|---------|-----------------------------------------|
|----|---------|-----------------------------------------|

|   |                                                                                     |                                                                                                                                                                                                                                                                                                                                                                                                                                                                                                                                                                                       |
|---|-------------------------------------------------------------------------------------|---------------------------------------------------------------------------------------------------------------------------------------------------------------------------------------------------------------------------------------------------------------------------------------------------------------------------------------------------------------------------------------------------------------------------------------------------------------------------------------------------------------------------------------------------------------------------------------|
| 1 | 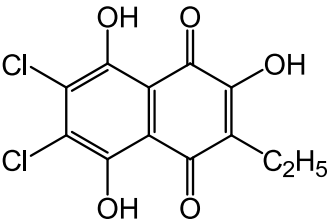   | <b>6,7-dichloro-2-ethyl-3,5,8-trihydroxy-1,4-naphthoquinone</b><br>was synthesized as described in Anufriev, V.Ph.; Polonik, S.G.; Pokhilo, N.D.; Balanyova, N.N., Chemistry of naphthazarin derivatives. 11. Trisubstituted hydroquinone derivatives in the preparative synthesis of naphthazarins. <i>Russ. Chem. Bull. (Translation of Izvestiya Akademii Nauk, Seriya Khimicheskaya)</i> <b>2003</b> , 52, 2247-2250.                                                                                                                                                             |
| 2 |    | <b>6-chloro-2,3,5,8-tetrahydroxy-7-methyl-1,4-naphthoquinone</b><br>was synthesized from methylchloromaleic anhydride and 1-hydroxy 2,3,4-trimethoxybenzene in a manner analogous to 6,7-dichloro-2-ethyl-3,5,8-trihydroxy-1,4-naphthoquinone (1) described by Anufriev, V.Ph.; Polonik, S.G.; Pokhilo, N.D.; Balanyova, N.N., Chemistry of naphthazarin derivatives. 11. Trisubstituted hydroquinone derivatives in the preparative synthesis of naphthazarins. <i>Russ. Chem. Bull. (Translation of Izvestiya Akademii Nauk, Seriya Khimicheskaya)</i> <b>2003</b> , 52, 2247-2250. |
| 3 |    | <b>6,7-dichloro-2,5,8-trihydroxy-3-methyl-1,4-naphthoquinone</b><br>was synthesized from dichloromaleic anhydride and 1,2,4-trimethoxy-3-methylbenzene in a manner analogous to 6,7-dichloro-2-ethyl-3,5,8-trihydroxy-1,4-naphthoquinone (1) described by Anufriev, V.Ph.; Polonik, S.G.; Pokhilo, N.D.; Balanyova, N.N., Chemistry of naphthazarin derivatives. 11. Trisubstituted hydroquinone derivatives in the preparative synthesis of naphthazarins. <i>Russ. Chem. Bull. (Translation of Izvestiya Akademii Nauk, Seriya Khimicheskaya)</i> <b>2003</b> , 52, 2247-2250.      |
| 4 |   | <b>6,7-dichloro-2,5,8-trihydroxy-1,4-naphthoquinone</b><br>was synthesized as described in Anufriev, V.Ph.; Novikov, V.L.; Maximov O.B., Elyakov G.B., Levitsky D.O., Lebedev A.V., Sadretdinov, S.M.; Shvilkin, A.V.; Afonskaya, N.I.; Ruda, M.Ya.; Cherpachenko, N.M., Synthesis of some hydroxynaphthazarins and their cardioprotective effects under ischemia-reperfusion <i>in vivo</i> . <i>Bioorg. Med. Chem. Lett.</i> <b>1998</b> , 8, 587-592.                                                                                                                              |
| 5 |  | <b>6,7-dichloro-2-ethyl-5,8-dihydroxy-1,4-naphthoquinone</b><br>was synthesized as described in Yakubovskaya, A.Ya.; Pokhilo, N.D.; Anufriev, V.F.; Anisimov, M.M., Synthesis and antimicrobial and antifungal activities of compounds of the naphthazarin series. <i>Pharmaceutical Chemistry Journal</i> <b>2009</b> , 43, 396-398.                                                                                                                                                                                                                                                 |
| 6 |  | <b>2,3-dichloro-5,8-dihydroxy-6,7-dimethyl-1,4-naphthoquinone</b><br>was synthesized as described in Anufriev, V.Ph.; Polonik, S.G.; Pokhilo, N.D.; Balanyova, N.N., Chemistry of naphthazarin derivatives. 11. Trisubstituted hydroquinone derivatives in the preparative synthesis of naphthazarins. <i>Russ. Chem. Bull. (Translation of Izvestiya Akademii Nauk, Seriya Khimicheskaya)</i> <b>2003</b> , 52, 2247-2250.                                                                                                                                                           |
| 7 |  | <b>2,5-dihydroxy-1,4-naphthoquinone</b><br>was synthesized as described in Fieser, L.F.; Dunn, J.T., The addition of dienes to halogenated and hydroxylated naphthoquinones. <i>J. Am. Chem. Soc.</i> <b>1937</b> , 59, 1016-1021.                                                                                                                                                                                                                                                                                                                                                    |
| 8 |  | <b>2,8-dihydroxy-1,4-naphthoquinone</b><br>was synthesized as described in Fieser, L.F.; Dunn, J.T., The addition of dienes to halogenated and hydroxylated naphthoquinones. <i>J. Am. Chem. Soc.</i> <b>1937</b> , 59, 1016-1021.                                                                                                                                                                                                                                                                                                                                                    |

|    |  |                                                                                                                                                                                                                                                                                                                                                                                                                                                                                        |
|----|--|----------------------------------------------------------------------------------------------------------------------------------------------------------------------------------------------------------------------------------------------------------------------------------------------------------------------------------------------------------------------------------------------------------------------------------------------------------------------------------------|
| 9  |  | <b>2-hydroxy-5,6,7-trimethoxy-1,4-naphthoquinone</b><br>was synthesized from 2-(3,4,5-trimethoxyphenyl)acetic acid as described in Kun, L.; Kun, Ya.; Lifang Zh.; Yuanyuan, L.; Qi W.; Ruili, L.; Dian, H., Anti-acute myeloid leukemia activity of 2-chloro-3-alkyl-1,4-naphthoquinone derivatives through inducing mtDNA damage and GSH depletion. <i>Bioorganic and Medicinal Chemistry</i> <b>2018</b> , 26, 4191–4200.                                                            |
| 10 |  | <b>2,5,8-trihydroxy-7-methoxy-1,4-naphthoquinone</b><br>was synthesized as described in Glazunov, V.P.; Tchizhova, A.Ya.; Shestak, O.P.; Sopel'nyak, G.I.; Anufriev, V.Ph., Chemistry of naphthazarin derivatives. 8. Determination of structures of substituted 2-hydroxy-6(7)-methoxynaphthazarins and 7(8)-hydroxypyranonaphthazarins by IR spectroscopy. <i>Russ. Chem. Bull.</i> (Translation of <i>Izvestiya Akademii Nauk, Seriya Khimicheskaya</i> ) <b>2001</b> , 50, 95-100. |
| 11 |  | <b>3,5-dihydroxy-6-methoxy-2-methyl-1,4-naphthoquinone (ancistroquinone B)</b><br>was synthesized as described in Khmelevskaya, E.A.; Pelageev, D.N., A convenient synthetic approach to dioncoquinone B and related compounds. <i>Tetrahedron Lett.</i> <b>2019</b> , 60, 1022-1024.                                                                                                                                                                                                  |
| 12 |  | <b>3,5,6-trihydroxy-2-methyl-1,4-naphthoquinone (dioncoquinone B)</b><br>was synthesized as described in Khmelevskaya, E.A.; Pelageev, D.N., A convenient synthetic approach to dioncoquinone B and related compounds. <i>Tetrahedron Lett.</i> <b>2019</b> , 60, 1022-1024.                                                                                                                                                                                                           |

**Table S1.2. Synthesized compounds.**

| No | Formula | Spectral Information, References, Notes                                                                                                                                                                                                                                                                                                                                                                                                                                                                                                                                                                                                                                                                                                                                                                                                                                                                                                                                                                                                   |
|----|---------|-------------------------------------------------------------------------------------------------------------------------------------------------------------------------------------------------------------------------------------------------------------------------------------------------------------------------------------------------------------------------------------------------------------------------------------------------------------------------------------------------------------------------------------------------------------------------------------------------------------------------------------------------------------------------------------------------------------------------------------------------------------------------------------------------------------------------------------------------------------------------------------------------------------------------------------------------------------------------------------------------------------------------------------------|
| 13 |         | <b>2-Ethyl-3,5,8-trihydroxy-6,7-di(2-hydroxyethylthio)-1,4-naphthoquinone (13)</b> (obtained from 6,7-dichloro-2-ethyl-3,5,8-trihydroxy-1,4-naphthoquinone (1)):<br>dark violet solid;<br>yield: 564 mg (73%);<br>mp 142–146 °C.<br><b>IR (CHCl<sub>3</sub>)</b> $\nu_{\text{max}}$ : 3419, 2937, 2878, 1601, 1382, 1365, 1330, 1279 cm <sup>-1</sup> .<br><b><sup>1</sup>H NMR (CDCl<sub>3</sub>, 300 MHz)</b> : $\delta$ = 14.05 (s, 1 H, $\alpha$ -OH), 12.49 (s, 1 H, $\alpha$ -OH), 7.49 (br s, 1 H, $\beta$ -OH), 3.71 (t, $J$ = 5.0 Hz, 2 H), 3.67 (t, $J$ = 5.0 Hz, 2 H), 3.47 (t, $J$ = 5.0 Hz, 2 H), 3.34 (t, $J$ = 5.0 Hz, 2 H), 2.63 (q, $J$ = 7.3 Hz, 2 H), 1.15 (t, $J$ = 7.3 Hz, 3 H).<br><b><sup>13</sup>C NMR (CDCl<sub>3</sub>, 75 MHz)</b> : $\delta$ = 187.9, 181.2, 158.0, 157.9, 153.5, 143.8, 136.3, 127.0, 109.2, 108.8, 61.1, 60.6, 39.0, 38.7, 16.4, 12.5.<br><b>HRMS (ESI)</b> : $m/z$ [M-H] <sup>-</sup> calcd for C <sub>16</sub> H <sub>17</sub> O <sub>7</sub> S <sub>2</sub> : 385.0421; found: 385.0424. |
| 14 |         | <b>2,3,5,8-tetrahydroxy-6-(2-hydroxyethylthio)-7-methyl-1,4-naphthoquinone (14)</b> (obtained from 6-chloro-2,3,5,8-tetrahydroxy-7-methyl-1,4-naphthoquinone (2)):<br>dark red solid;<br>yield: 393 mg (63%);<br>mp 195-200°C.<br><b>IR (KBr)</b> : 3480, 3402, 1677, 1658, 1599, 1451, 1406,                                                                                                                                                                                                                                                                                                                                                                                                                                                                                                                                                                                                                                                                                                                                             |

|                                                                                                                      |                                                                                                                                                                                                                                                                                                                                                                                                                                                                                                                                                                                                                                                                                                                                                                                                                                                                                                                                                                                                                                                                                                                                                                                                                                   |
|----------------------------------------------------------------------------------------------------------------------|-----------------------------------------------------------------------------------------------------------------------------------------------------------------------------------------------------------------------------------------------------------------------------------------------------------------------------------------------------------------------------------------------------------------------------------------------------------------------------------------------------------------------------------------------------------------------------------------------------------------------------------------------------------------------------------------------------------------------------------------------------------------------------------------------------------------------------------------------------------------------------------------------------------------------------------------------------------------------------------------------------------------------------------------------------------------------------------------------------------------------------------------------------------------------------------------------------------------------------------|
|                                                                                                                      | <p>1303, 1279, 1218 cm<sup>-1</sup>.<br/> <b><sup>1</sup>H NMR (acetone-d<sub>6</sub>, 300 MHz):</b> δ = 13.08 (s, 1 H, α-OH), 12.68 (s, 1 H, α-OH), 9.03 (s, 2 H, β-OH), 3.86 (br s, 1 H, OH), 3.65 (t, <i>J</i> = 6.5 Hz, 2 H), 3.21 (t, <i>J</i> = 6.5 Hz, 2 H), 2.49 (s, 3 H, CH<sub>3</sub>).<br/> <b><sup>13</sup>C NMR (DMSO-d<sub>6</sub>, 75 MHz):</b> δ = 183.8, 183.4, 157.2, 155.0, 142.2, 141.7, 141.6, 135.1, 108.1, 107.1, 61.0, 36.8, 15.0.<br/> <b>HRMS (ESI):</b> <i>m/z</i> [M-H]<sup>-</sup> calcd for C<sub>13</sub>H<sub>11</sub>O<sub>7</sub>S: 311.0231; found: 311.0232.</p>                                                                                                                                                                                                                                                                                                                                                                                                                                                                                                                                                                                                                             |
| <p><b>15a</b><br/><b>15b</b></p> 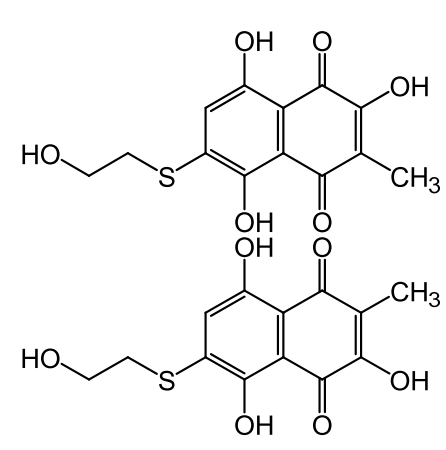  | <p><b>mixture of 2,5,8-trihydroxy-6-(2-hydroxyethylthio)-3-methyl-1,4-naphthoquinone (15a) and 3,5,8-trihydroxy-6-(2-hydroxyethylthio)-2-methyl-1,4-naphthoquinone (15b)</b><br/> (obtained from 6,7-dichloro-2,5,8-trihydroxy-3-methyl-1,4-naphthoquinone (<b>3</b>)):<br/> Dark red solid; yield: 326 mg (55%);<br/> <b>HRMS (ESI):</b> <i>m/z</i> [M-H]<sup>-</sup> calcd for C<sub>13</sub>H<sub>11</sub>O<sub>6</sub>S: 295.0282; found: 295.0286.<br/> <b>15a</b><br/> <b><sup>1</sup>H NMR (CDCl<sub>3</sub>, 300 MHz):</b> δ = 13.71 (s, 1 H, α-OH), 11.67 (s, 1 H, α-OH), 6.95 (s, 1 H), 3.96 (t, <i>J</i> = 6.0 Hz, 2 H), 3.22 (t, <i>J</i> = 6.0 Hz, 2 H), 2.09 (s, 3 H).<br/> <b><sup>13</sup>C NMR (CDCl<sub>3</sub>, 75 MHz):</b> δ = 188.3, 179.1, 158.6, 155.6, 154.5, 145.6, 120.4, 119.5, 109.0, 107.1, 60.1, 33.9, 8.4.<br/> <b>15b</b><br/> <b><sup>1</sup>H NMR (CDCl<sub>3</sub>, 300 MHz):</b> δ = 12.92 (s, 1 H, α-OH), 12.16 (s, 1 H, α-OH), 7.08 (s, 1 H), 3.93 (t, <i>J</i> = 6.0 Hz, 2 H), 3.21 (t, <i>J</i> = 6.0 Hz, 2 H), 2.11 (s, 3 H).<br/> <b><sup>13</sup>C NMR (CDCl<sub>3</sub>, 75 MHz):</b> δ = 186.7, 181.2, 158.1, 156.2, 153.1, 139.8, 124.5, 122.4, 109.2, 107.6, 60.1, 33.7, 8.2.</p> |
| <p><b>16</b></p>                  | <p><b>6,7-di(2-hydroxyethylthio)-2,5,8-trihydroxy-1,4-naphthoquinone (16)</b> (obtained from 6,7-dichloro-2,5,8-trihydroxy-1,4-naphthoquinone (<b>4</b>)):<br/> dark violet solid;<br/> yield: 437 mg (61%);<br/> mp 187–189 °C.<br/> <b>IR (KBr):</b> 3525, 2917, 1663, 1607, 1545, 1467, 1408, 1387, 1357 cm<sup>-1</sup>.<br/> <b><sup>1</sup>H NMR (DMSO-d<sub>6</sub>, 300 MHz):</b> δ = 13.91 (br s, 1 H, α-OH), 13.35 (br s, 1 H, α-OH), 12.27 (br s, 1 H, β-OH), 6.57 (s, 1 H), 5.65 (br s, 2 H, OH), 3.63–3.49 (m, 4 H), 2.75–2.63 (m, 4 H).<br/> <b><sup>13</sup>C NMR (DMSO-d<sub>6</sub>, 75 MHz):</b> δ = 186.1, 178.1, 162.3, 160.1, 158.4, 138.2, 136.5, 111.4, 110.5, 109.6, 61.5, 61.3, 36.9, 36.8.<br/> <b>HRMS (ESI):</b> <i>m/z</i> [M-H]<sup>-</sup> calcd for C<sub>14</sub>H<sub>13</sub>O<sub>7</sub>S<sub>2</sub>: 357.0108; found: 357.0111.</p>                                                                                                                                                                                                                                                                                                                                                        |
| <p><b>17a</b><br/><b>17b</b></p>  | <p><b>mixture of 2-ethyl-5,8-dihydroxy-7-(2-hydroxyethylthio)-1,4-naphthoquinone (17a) and 2-ethyl-5,8-dihydroxy-6-(2-hydroxyethylthio)-1,4-naphthoquinone (17b)</b><br/> (obtained from 6,7-dichloro-2-ethyl-5,8-dihydroxy-1,4-naphthoquinone(<b>5</b>)):<br/> red solid;<br/> yield: 265 mg (45%);<br/> <b>HRMS (ESI):</b> <i>m/z</i> [M-H]<sup>-</sup> calcd for C<sub>14</sub>H<sub>13</sub>O<sub>5</sub>S: 293.0489; found: 293.0491.</p>                                                                                                                                                                                                                                                                                                                                                                                                                                                                                                                                                                                                                                                                                                                                                                                    |

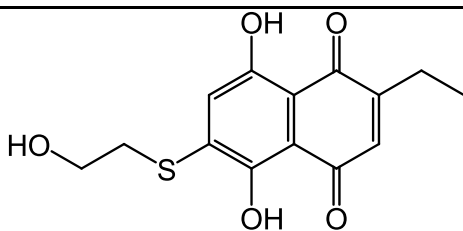

#### 17a

**<sup>1</sup>H NMR (CDCl<sub>3</sub>, 300 MHz):** δ = 12.75 (s, 1 H, α-OH), 12.64 (s, 1 H, α-OH), 7.07 (s, 1 H), 6.73 (s, 1 H), 3.92 (t, *J* = 6.0 Hz, 2 H), 3.12 (t, *J* = 6.0 Hz, 2 H), 2.72 (q, *J* = 7.5 Hz, 2 H), 1.91 (br s, 1H, OH), 1.25 (t, *J* = 7.5 Hz, 3 H).

**<sup>13</sup>C NMR (CDCl<sub>3</sub>, 75 MHz):** δ = 180.0, 179.7, 163.1, 162.7, 152.5, 147.0, 129.5, 127.0, 110.9, 109.4, 59.9, 33.5, 23.0, 12.6.

#### 17b

**<sup>1</sup>H NMR (CDCl<sub>3</sub>, 300 MHz):** δ = 13.06 (s, 1 H, α-OH), 12.38 (s, 1 H, α-OH), 7.02 (s, 1 H), 6.72 (s, 1 H), 3.92 (t, *J* = 6.0 Hz, 2 H), 3.12 (t, *J* = 6.0 Hz, 2 H), 2.73 (q, *J* = 7.5 Hz, 2 H), 1.91 (br s, 1H, OH), 1.25 (t, *J* = 7.5 Hz, 3 H).

**<sup>13</sup>C NMR (CDCl<sub>3</sub>, 75 MHz):** δ = 180.8, 179.4, 163.5, 161.8, 153.2, 149.4, 127.3, 126.7, 110.3, 109.9, 59.9, 33.5, 23.1, 12.6.

18a  
18b

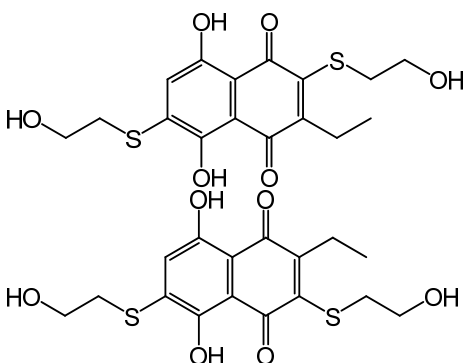

#### mixture of 3-ethyl-5,8-dihydroxy-2,6-di(2-hydroxyethylthio)-1,4-naphthoquinone (18a) and 2-ethyl-5,8-dihydroxy-3,6-di(2-hydroxyethylthio)-1,4-naphthoquinone (18b)

(obtained from 6,7-dichloro-2-ethyl-5,8-dihydroxy-1,4-naphthoquinone(5)):

red solid;

yield: 200 mg (27%);

**HRMS (ESI):** *m/z* [M-H]<sup>-</sup> calcd for C<sub>16</sub>H<sub>17</sub>O<sub>6</sub>S<sub>2</sub>: 369.0472; found: 369.0474.

#### 18a

**<sup>1</sup>H NMR (CDCl<sub>3</sub>, 300 MHz):** δ = 13.23 (s, 1 H, α-OH), 13.08 (s, 1 H, α-OH), 6.82 (s, 1 H), 3.95 (t, *J* = 7.5 Hz, 2 H), 3.79 (t, *J* = 7.5 Hz, 2 H), 3.15 (t, *J* = 7.5 Hz, 2 H), 3.11 (t, *J* = 7.5 Hz, 2 H), 3.07 (q, *J* = 7.5 Hz, 2 H), 1.17 (t, *J* = 7.5 Hz, 3 H).

**<sup>13</sup>C NMR (CDCl<sub>3</sub>, 75 MHz):** δ = 175.6, 174.5, 167.9, 165.7, 154.2, 148.8, 136.1, 125.8, 110.1, 109.7, 60.7, 59.3, 36.1, 31.5, 22.8, 13.7.

#### 18b

**<sup>1</sup>H NMR (CDCl<sub>3</sub>, 300 MHz):** δ = 13.36 (s, 1 H, α-OH), 13.02 (s, 1 H, α-OH), 6.81 (s, 1 H), 3.93 (t, *J* = 7.5 Hz, 2 H), 3.75 (t, *J* = 7.5 Hz, 2 H), 3.17 (t, *J* = 7.5 Hz, 2 H), 3.13 (t, *J* = 7.5 Hz, 2 H), 3.06 (q, *J* = 7.5 Hz, 2 H), 1.16 (t, *J* = 7.5 Hz, 3 H).

**<sup>13</sup>C NMR (CDCl<sub>3</sub>, 75 MHz):** δ = 175.2, 174.1, 167.3, 167.1, 151.5, 149.1, 139.4, 125.3, 110.4, 109.0, 60.6, 59.4, 36.1, 31.5, 22.8, 13.7.

19

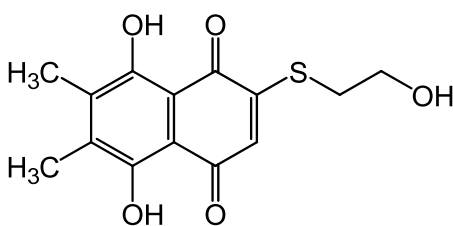

#### 5,8-dihydroxy-2-(2-hydroxyethylthio)-6,7-dimethyl-1,4-naphthoquinone (19) (obtained from 2,3-dichloro-5,8-dihydroxy-6,7-dimethyl-1,4-naphthoquinone (6)):

purple solid;

yield: 194 mg (33%);

mp 133-137°C.

**IR (CHCl<sub>3</sub>):** 3662, 3610, 2929, 2883, 2857, 1715, 1600, 1552, 1432, 1391, 1302, 1261 cm<sup>-1</sup>.

**<sup>1</sup>H NMR (CDCl<sub>3</sub>, 300 MHz):** δ = 13.11 (s, 1 H, α-OH), 13.07 (s, 1 H, α-OH), 6.78 (s, 1 H), 3.97 (t, *J* = 6.0 Hz, 2 H), 3.15 (t, *J* = 6.0 Hz, 2 H), 2.25 (s, 3 H, Me), 2.24 (s, 3 H, Me).

**<sup>13</sup>C NMR (CDCl<sub>3</sub>, 75 MHz):** δ = 173.8, 172.6, 169.8, 168.5, 149.3, 141.9, 139.6, 125.1, 109.3, 108.4, 59.8,

|                                                                                                                                                                                      |                                                                                                                                                                                                                                                                                                                                                                                                                                                                                                                                                                                                                                                                                                                                                                                           |
|--------------------------------------------------------------------------------------------------------------------------------------------------------------------------------------|-------------------------------------------------------------------------------------------------------------------------------------------------------------------------------------------------------------------------------------------------------------------------------------------------------------------------------------------------------------------------------------------------------------------------------------------------------------------------------------------------------------------------------------------------------------------------------------------------------------------------------------------------------------------------------------------------------------------------------------------------------------------------------------------|
|                                                                                                                                                                                      | 33.5, 12.5, 12.3.<br><b>HRMS (ESI):</b> $m/z$ [M-H] <sup>-</sup> calcd for C <sub>14</sub> H <sub>13</sub> O <sub>5</sub> S: 293.0489;<br>found: 293.0488.                                                                                                                                                                                                                                                                                                                                                                                                                                                                                                                                                                                                                                |
| <div style="display: flex; align-items: center;"> <div style="margin-right: 10px;">20</div> 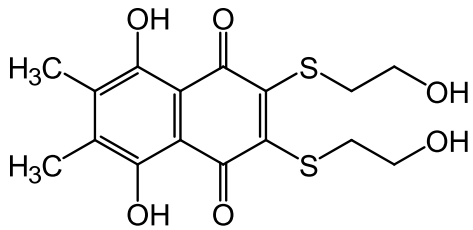 </div> | <b>5,8-dihydroxy-2,3-di(2-hydroxyethylthio)-6,7-dimethyl-1,4-naphthoquinone (20)</b> (obtained from 2,3-dichloro-5,8-dihydroxy-6,7-dimethyl-1,4-naphthoquinone ( <b>6</b> )):<br>purple solid;<br>yield: 356 mg (48%);<br>mp 115-120°C.<br><b>IR (CHCl<sub>3</sub>):</b> 2932, 2875, 1601, 1395, 1330, 1297, 1269 cm <sup>-1</sup> .<br><b><sup>1</sup>H NMR (CDCl<sub>3</sub>, 300 MHz):</b> δ = 13.50 (s, 2 H, 2 α-OH), 3.72 (t, <i>J</i> = 4.7 Hz, 4 H), 3.43 (t, <i>J</i> = 4.7 Hz, 4 H), 2.23 (s, 6 H, Me).<br><b><sup>13</sup>C NMR (CDCl<sub>3</sub>, 75 MHz):</b> δ = 172.7, 169.9, 144.3, 141.5, 109.6, 61.3, 38.7, 12.6.<br><b>HRMS (ESI):</b> $m/z$ [M-H] <sup>-</sup> calcd for C <sub>16</sub> H <sub>17</sub> O <sub>6</sub> S <sub>2</sub> : 369.0472;<br>found: 369.0475. |

**Table S1.3. Synthesized compounds.**

| No | Formula                                                                             | Spectral Information, References, Notes                                                                                                                                                                                                                                                                                                                                                                                                                                                                                                                                                                                                                                                                                                                                                                                                                                                                                                                            |
|----|-------------------------------------------------------------------------------------|--------------------------------------------------------------------------------------------------------------------------------------------------------------------------------------------------------------------------------------------------------------------------------------------------------------------------------------------------------------------------------------------------------------------------------------------------------------------------------------------------------------------------------------------------------------------------------------------------------------------------------------------------------------------------------------------------------------------------------------------------------------------------------------------------------------------------------------------------------------------------------------------------------------------------------------------------------------------|
| 21 | 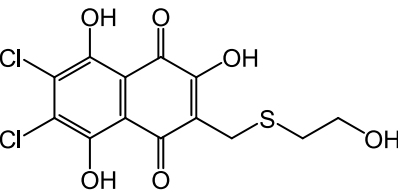 | <b>6,7-dichloro-2,5,8-trihydroxy-3-((2-hydroxyethylthio)methyl)-1,4-naphthoquinone (21)</b><br>(obtained from 6,7-dichloro-2,5,8-trihydroxy-1,4-naphthoquinone ( <b>4</b> )):<br>red solid;<br>yield: 347 mg (95%);<br>mp 165-168°C.<br><b>IR (KBr):</b> 3415, 1608, 1402, 1277, 1217, 1178, 1135, 1114, 1054, 990 cm <sup>-1</sup> .<br><b><sup>1</sup>H NMR (DMSO-d<sub>6</sub>, 300 MHz):</b> δ = 13.71 (br s, 1 H, α-OH), 13.51 (br s, 1 H, α-OH), 12.22 (br s, 1 H, β-OH), 5.62 (br s, 1 H, OH), 3.56 (s, 2 H), 3.54 (t, <i>J</i> = 6.8 Hz, 2 H), 2.62 (t, <i>J</i> = 6.8 Hz, 2 H).<br><b><sup>13</sup>C NMR (DMSO-d<sub>6</sub>, 75 MHz):</b> δ = 186.7, 181.8, 157.5, 153.0, 152.8, 132.0, 129.7, 122.2, 110.8, 110.1, 60.9, 35.0, 23.2.<br><b>HRMS (ESI):</b> <i>m/z</i> [M-H] <sup>-</sup> calcd for C <sub>13</sub> H <sub>9</sub> Cl <sub>2</sub> O <sub>6</sub> S: 362.9502; found: 362.9503.                                                          |
| 22 |  | <b>2,5-dihydroxy-3-((2-hydroxyethylthio)methyl)-1,4-naphthoquinone (22)</b> (obtained from 2,5-dihydroxy-1,4-naphthoquinone ( <b>7</b> )):<br>yellow solid;<br>yield: 260 mg (93%);<br>mp 124-126 °C.<br><b>IR (CHCl<sub>3</sub>):</b> 3393, 2930, 1661, 1622, 1603, 1459, 1388, 1332, 1294, 1277, 1241, 1228, 1220, 1206, 1166 cm <sup>-1</sup> .<br><b><sup>1</sup>H NMR (CDCl<sub>3</sub>, 300 MHz):</b> δ = 12.28 (s, 1 H, α-OH), 7.68 (dd, <i>J</i> = 7.5, 1.0 Hz, 1 H), 7.65 (br s, 1 H, β-OH), 7.57 (t, <i>J</i> = 7.5 Hz, 1 H), 7.32 (dd, <i>J</i> = 7.5, 1.0 Hz, 1 H), 3.86 (t, <i>J</i> = 7.8 Hz, 2 H), 3.73 (s, 2 H), 2.81 (t, <i>J</i> = 7.8 Hz, 2 H).<br><b><sup>13</sup>C NMR (CDCl<sub>3</sub>, 75 MHz):</b> δ = 189.7, 180.5, 161.6, 153.7, 135.4, 129.3, 126.8, 120.6, 119.7, 114.3, 60.8, 35.6, 22.6.<br><b>HRMS (ESI):</b> <i>m/z</i> [M-H] <sup>-</sup> calcd for C <sub>13</sub> H <sub>11</sub> O <sub>5</sub> S: 279.0333; found: 279.0336. |

|                                                                                                      |                                                                                                                                                                                                                                                                                                                                                                                                                                                                                                                                                                                                                                                                                                                                                                                                                                                                                                                              |
|------------------------------------------------------------------------------------------------------|------------------------------------------------------------------------------------------------------------------------------------------------------------------------------------------------------------------------------------------------------------------------------------------------------------------------------------------------------------------------------------------------------------------------------------------------------------------------------------------------------------------------------------------------------------------------------------------------------------------------------------------------------------------------------------------------------------------------------------------------------------------------------------------------------------------------------------------------------------------------------------------------------------------------------|
| <p><b>23</b></p> 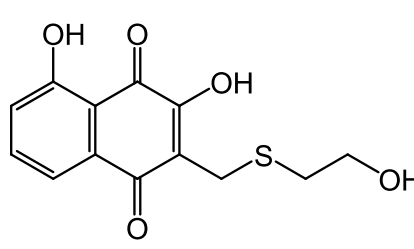   | <p><b>3,5-dihydroxy-2-((2-hydroxyethylthio)methyl)-1,4-naphthoquinone (23)</b> (obtained from 2,8-dihydroxy-1,4-naphthoquinone (<b>8</b>)):<br/>yellow solid;<br/>yield: 266 mg (95%);<br/>mp 132-134 °C.<br/><b>IR (KBr)</b>: 3374, 2931, 1624, 1577, 1482, 1460, 1406, 1386, 1369, 1292, 1218, 1209, 1162, 1146, 1066 cm<sup>-1</sup>.<br/><b><sup>1</sup>H NMR (CDCl<sub>3</sub>, 300 MHz)</b>: δ = 11.07 (s, 1 H, α-OH), 7.72-7.62 (m, 2 H), 7.60 (s, 1 H, β-OH), 7.23 (dd, <i>J</i> = 7.5, 2.0 Hz, 1 H), 3.85 (t, <i>J</i> = 5.6 Hz, 2 H), 3.82 (s, 2 H), 2.80 (t, <i>J</i> = 5.6 Hz, 2 H).<br/><b><sup>13</sup>C NMR (CDCl<sub>3</sub>, 75 MHz)</b>: δ = 184.4, 183.0, 161.5, 153.0, 137.9, 132.3, 123.6, 122.3, 120.0, 113.0, 60.8, 35.6, 23.0.<br/><b>HRMS (ESI)</b>: <i>m/z</i> [M-H]<sup>-</sup> calcd for C<sub>13</sub>H<sub>11</sub>O<sub>5</sub>S: 279.0333; found: 279.0334.</p>                              |
| <p><b>24</b></p>    | <p><b>2-hydroxy-3-((2-hydroxyethylthio)methyl)-5,6,7-trimethoxy-1,4-naphthoquinone (24)</b> (obtained from 2-hydroxy-5,6,7-trimethoxy-1,4-naphthoquinone (<b>9</b>)):<br/>yellow solid;<br/>yield: 322 mg (91%);<br/>mp 126-128°C.<br/><b>IR (KBr)</b>: 3413, 2941, 1659, 1574, 1484, 1468, 1454, 1416, 1373, 1328, 1251, 1215, 1200, 1142, 1100, 972 cm<sup>-1</sup>.<br/><b><sup>1</sup>H NMR (CDCl<sub>3</sub>, 300 MHz)</b>: δ = 7.48 (s, 1 H), 7.40 (br s, 1 H, β-OH), 4.00 (s, 3 H), 3.98 (s, 3 H), 3.93 (s, 3 H), 3.84 (t, <i>J</i> = 5.8 Hz, 2 H), 3.70 (s, 2 H), 2.81 (t, <i>J</i> = 5.8 Hz, 2 H).<br/><b><sup>13</sup>C NMR (CDCl<sub>3</sub>, 75 MHz)</b>: δ = 182.6, 180.7, 156.7, 154.7, 151.6, 149.7, 126.3, 122.0, 119.7, 106.2, 61.6, 61.4, 60.7, 56.4, 35.7, 23.1.<br/><b>HRMS (ESI)</b>: <i>m/z</i> [M-H]<sup>-</sup> calcd for C<sub>16</sub>H<sub>17</sub>O<sub>7</sub>S: 353.0700; found: 353.0703.</p> |
| <p><b>25</b></p>  | <p><b>3,5,8-trihydroxy-2-((2-hydroxyethylthio)methyl)-6-methoxy-1,4-naphthoquinone (25)</b> (obtained from 2,5,8-trihydroxy-7-methoxy-1,4-naphthoquinone (<b>10</b>)):<br/>red solid;<br/>yield: 300 mg (92%);<br/>mp 195-198°C.<br/><b>IR (KBr)</b>: 3530, 1594, 1484, 1455, 1437, 1408, 1385, 1363, 1309, 1195, 1064, 1024 cm<sup>-1</sup>.<br/><b><sup>1</sup>H NMR (CDCl<sub>3</sub>, 300 MHz)</b>: δ = 13.22 (s, 1 H, α-OH), 12.03 (s, 1 H, α-OH), 7.32 (s, 1 H, β-OH), 6.59 (s, 1 H), 3.99 (s, 3 H, OCH<sub>3</sub>), 3.87 (t, <i>J</i> = 7.8 Hz, 2 H), 3.85 (s, 2 H), 2.80 (t, <i>J</i> = 7.8 Hz, 2 H).<br/><b><sup>13</sup>C NMR (CDCl<sub>3</sub>, 75 MHz)</b>: δ = 181.6, 177.2, 164.2, 157.1, 155.4, 152.9, 122.8, 110.3, 109.4, 108.8, 60.8, 56.8, 35.6, 23.0.<br/><b>HRMS (ESI)</b>: <i>m/z</i> [M-H]<sup>-</sup> calcd for C<sub>14</sub>H<sub>13</sub>O<sub>7</sub>S: 325.0387; found: 325.0387.</p>          |

**Table S1.4. Synthesized compounds.**

| No | Formula                                                                             | Spectral Information, References, Notes                                                                                                                                                                                                                |
|----|-------------------------------------------------------------------------------------|--------------------------------------------------------------------------------------------------------------------------------------------------------------------------------------------------------------------------------------------------------|
| 26 | 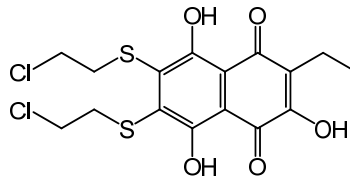 | <p><b>6,7-di(2-chloroethylthio)-2-ethyl-3,5,8-trihydroxy-1,4-naphthoquinone (26)</b> (obtained from 6,7-di(2-hydroxyethylthio)-2,5,8-trihydroxy-1,4-naphthoquinone (<b>13</b>)):<br/>dark violet solid;<br/>yield: 159 mg (75%);<br/>mp 126-128°C.</p> |

27

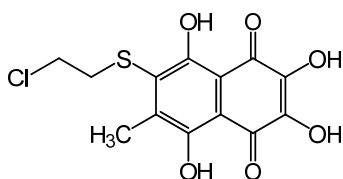

**IR** ( $\text{CHCl}_3$ ): 3418, 2977, 1617, 1600, 1365, 1331, 1280  $\text{cm}^{-1}$ .

**$^1\text{H}$  NMR** ( $\text{CDCl}_3$ , 300 MHz):  $\delta$  = 14.07 (s, 1 H,  $\alpha$ -OH), 12.49 (s, 1 H,  $\alpha$ -OH), 7.35 (s, 1 H,  $\beta$ -OH), 3.73-3.56 (m, 6 H), 3.50-3.43 (m, 2 H), 2.64 (q,  $J$  = 7.5 Hz, 2 H), 1.16 (t,  $J$  = 7.5 Hz, 3 H).

**$^{13}\text{C}$  NMR** ( $\text{CDCl}_3$ , 75 MHz):  $\delta$  = 187.4, 180.5, 158.0, 157.8, 153.3, 143.2, 135.4, 126.9, 109.0, 108.6, 43.3, 43.1, 36.7, 36.5, 16.3, 12.4.

**HRMS** (ESI):  $m/z$   $[\text{M}-\text{H}]^-$  calcd for  $\text{C}_{16}\text{H}_{15}\text{Cl}_2\text{O}_5\text{S}_2$ : 420.9743; found: 420.9744.

**6-(2-Chloroethylthio)-2,3,5,8-tetrahydroxy-7-methyl-1,4-naphthoquinone** (obtained from 2,3,5,8-tetrahydroxy-6-(2-hydroxyethylthio)-7-methyl-1,4-naphthoquinone (**14**)):

purple solid;

yield: 136 mg (82%);

mp 162-166°C.

**IR** ( $\text{CHCl}_3$ ): 3662, 3433, 1693, 1599, 1416, 1376, 1310, 1288  $\text{cm}^{-1}$ .

**$^1\text{H}$  NMR** ( $\text{CDCl}_3$ , 300 MHz):  $\delta$  = 12.69 (s, 1 H,  $\alpha$ -OH), 12.23 (s, 1 H,  $\alpha$ -OH), 6.70 (s, 2 H,  $\beta$ -OH), 3.60 (t,  $J$  = 7.5 Hz, 2 H), 3.41 (t,  $J$  = 7.5 Hz, 2 H), 2.54 (s, 3 H).

**$^{13}\text{C}$  NMR** ( $\text{DMSO}-d_6$ , 75 MHz):  $\delta$  = 183.3, 183.1, 156.5, 154.5, 142.3, 141.2, 141.2, 132.8, 108.0, 106.9, 43.9, 35.7, 14.5.

**HRMS** (ESI):  $m/z$   $[\text{M}-\text{H}]^-$  calcd for  $\text{C}_{13}\text{H}_{10}\text{ClO}_6\text{S}$ : 328.9892; found: 328.9896.

28

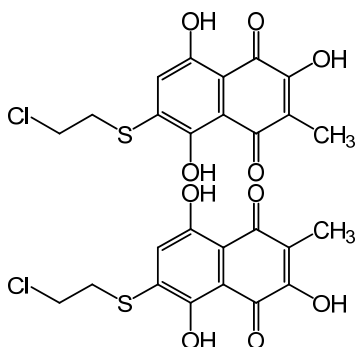

**mixture of 6-(2-chloroethylthio)-2,5,8-trihydroxy-3-methyl-1,4-naphthoquinone (28a) and 6-(2-chloroethylthio)-3,5,8-trihydroxy-2-methyl-1,4-naphthoquinone (28b)**

(obtained from the mixture of 2,5,8-trihydroxy-6-(2-hydroxyethylthio)-3-methyl-1,4-naphthoquinone (**15a**) and 3,5,8-trihydroxy-6-(2-hydroxyethylthio)-2-methyl-1,4-naphthoquinone (**15b**)):

dark red solid;

yield: 134 mg (85%);

**HRMS** (ESI):  $m/z$   $[\text{M}-\text{H}]^-$  calcd for  $\text{C}_{13}\text{H}_{10}\text{ClO}_5\text{S}$ : 312.9943; found: 312.9945.

**6-(2-chloroethylthio)-2,5,8-trihydroxy-3-methyl-1,4-naphthoquinone (28a)**

**$^1\text{H}$  NMR** ( $\text{CDCl}_3$ , 700 MHz):  $\delta$  = 13.64 (s, 1 H,  $\alpha$ -OH), 11.61 (s, 1 H,  $\alpha$ -OH), 7.45 (s, 1 H,  $\beta$ -OH), 6.88 (s, 1 H), 3.75 (t,  $J$  = 7.5 Hz, 2 H), 3.37 (t,  $J$  = 7.5 Hz, 2 H), 2.08 (s, 3 H).

**$^{13}\text{C}$  NMR** ( $\text{CDCl}_3$ , 175 MHz):  $\delta$  = 188.3, 179.3, 158.4, 155.4, 154.5, 144.3, 120.6, 119.4, 109.2, 107.4, 40.9, 32.7, 8.1.

**6-(2-chloroethylthio)-3,5,8-trihydroxy-2-methyl-1,4-naphthoquinone (28b)**

**$^1\text{H}$  NMR** ( $\text{CDCl}_3$ , 700 MHz):  $\delta$  = 12.87 (s, 1 H,  $\alpha$ -OH), 12.10 (s, 1 H,  $\alpha$ -OH), 7.25 (s, 1 H,  $\beta$ -OH), 7.03 (s, 1 H), 3.73 (t,  $J$  = 7.5 Hz, 2 H), 3.36 (t,  $J$  = 7.5 Hz, 2 H), 2.10 (s, 3 H).

**$^{13}\text{C}$  NMR** ( $\text{CDCl}_3$ , 175 MHz):  $\delta$  = 186.9, 181.3, 157.9, 155.9, 153.1, 138.5, 124.5, 122.4, 109.4, 107.9, 41.1, 32.9, 8.3.



29

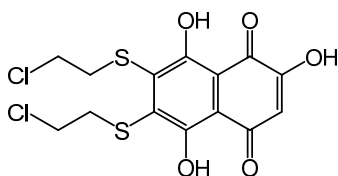

**6,7-di(2-chloroethylthio)-2,5,8-trihydroxy-1,4-naphthoquinone** (obtained from 6,7-di(2-hydroxyethylthio)-2,5,8-trihydroxy-1,4-naphthoquinone (**16**)):

purple solid;

yield: 134 mg (68%);

mp 133–136 °C.

**IR (CHCl<sub>3</sub>):** 3518, 3413, 2953, 1659, 1605, 1534, 1442, 1403, 1384, 1343, 1269, 1194, 1106 cm<sup>-1</sup>.

**<sup>1</sup>H NMR (CDCl<sub>3</sub>, 300 MHz):** δ = 13.84 (s, 1 H, α-OH), 12.52 (s, 1 H, α-OH), 7.41 (s, 1 H, β-OH), 6.43 (s, 1 H), 3.75–3.61 (m, 6 H), 3.48 (t, *J* = 7.5 Hz, 2 H).

**<sup>13</sup>C NMR (CDCl<sub>3</sub>, 75 MHz):** δ = 185.6, 177.2, 160.8, 159.8, 157.0, 137.9, 135.8, 111.0, 109.1, 108.7, 43.5, 43.3, 36.9, 36.5.

**HRMS (ESI):** *m/z* [M-H]<sup>-</sup> calcd for C<sub>14</sub>H<sub>11</sub>Cl<sub>2</sub>O<sub>5</sub>S<sub>2</sub>: 392.9430; found: 392.9431.

30

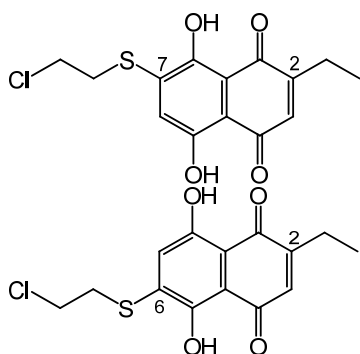

**Equimolar mixture of 7-(2-chloroethylthio)-2-ethyl-5,8-dihydroxy-1,4-naphthoquinone (30a) and 6-(2-chloroethylthio)-2-ethyl-5,8-dihydroxy-1,4-naphthoquinone (30b)**

(obtained from the mixture of 2-ethyl-5,8-dihydroxy-7-(2-hydroxyethylthio)-1,4-naphthoquinone (**17a**) and 2-ethyl-5,8-dihydroxy-6-(2-hydroxyethylthio)-1,4-naphthoquinone (**17b**)):

red solid; yield:

134 mg (86%);

**HRMS (ESI):** *m/z* [M-H]<sup>-</sup> calcd for C<sub>14</sub>H<sub>12</sub>ClO<sub>4</sub>S: 311.0150; found: 311.0151.

**7-(2-chloroethylthio)-2-ethyl-5,8-dihydroxy-1,4-naphthoquinone (30a)**

**<sup>1</sup>H NMR (CDCl<sub>3</sub>, 300 MHz):** δ = 12.73 (s, 1 H, α-OH), 12.62 (s, 1 H, α-OH), 7.07 (s, 1 H), 6.68 (s, 1 H), 3.76 (t, *J* = 7.5 Hz, 2 H), 3.28 (t, *J* = 7.5 Hz, 2 H), 2.71 (q, *J* = 7.5 Hz, 2 H), 1.25 (t, *J* = 7.5 Hz, 3 H).

**<sup>13</sup>C NMR (CDCl<sub>3</sub>, 75 MHz):** δ = 179.1, 179.0, 163.8, 163.3, 151.2, 147.3, 129.6, 126.6, 110.8, 109.3, 40.4, 32.4, 22.9, 12.5.

**6-(2-chloroethylthio)-2-ethyl-5,8-dihydroxy-1,4-naphthoquinone (30b)**

**<sup>1</sup>H NMR (CDCl<sub>3</sub>, 300 MHz):** δ = 13.03 (s, 1 H, α-OH), 12.36 (s, 1 H, α-OH), 7.01 (s, 1 H), 6.66 (s, 1 H), 3.76 (t, *J* = 7.5 Hz, 2 H), 3.28 (t, *J* = 7.5 Hz, 2 H), 2.73 (q, *J* = 7.5 Hz, 2 H), 1.26 (t, *J* = 7.5 Hz, 3 H).

**<sup>13</sup>C NMR (CDCl<sub>3</sub>, 75 MHz):** δ = 180.1, 178.5, 164.1, 162.4, 152.0, 149.6, 127.5, 126.2, 110.1, 109.9, 40.4, 32.4, 23.1, 12.5.

31

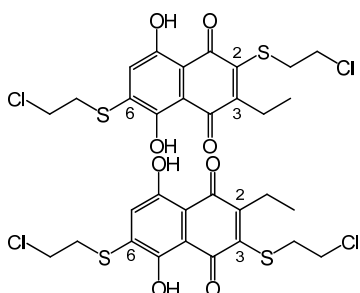

**Equimolar mixture of 2,6-di(2-chloroethylthio)-3-ethyl-5,8-dihydroxy-1,4-naphthoquinone (31a) and 3,6-di(2-chloroethylthio)-2-ethyl-5,8-dihydroxy-1,4-naphthoquinone (31b)**

(obtained from the mixture of 3-ethyl-5,8-dihydroxy-2,6-di(2-hydroxyethylthio)-1,4-naphthoquinone (**18a**) and 2-ethyl-5,8-dihydroxy-3,6-di(2-hydroxyethylthio)-1,4-naphthoquinone (**18b**)):

dark red solid;

yield: 141 mg (69%);

**HRMS (ESI):** *m/z* [M-H]<sup>-</sup> calcd for C<sub>16</sub>H<sub>15</sub>Cl<sub>2</sub>O<sub>4</sub>S<sub>2</sub>: 404.9794; found: 404.9792.

**2,6-di(2-chloroethylthio)-3-ethyl-5,8-dihydroxy-**

|                                                                                               |                                                                                                                                                                                                                                                                                                                                                                                                                                                                                                                                                                                                                                                                                                                                                                                                                                                                                                                                                                                                                                                                                                                                 |
|-----------------------------------------------------------------------------------------------|---------------------------------------------------------------------------------------------------------------------------------------------------------------------------------------------------------------------------------------------------------------------------------------------------------------------------------------------------------------------------------------------------------------------------------------------------------------------------------------------------------------------------------------------------------------------------------------------------------------------------------------------------------------------------------------------------------------------------------------------------------------------------------------------------------------------------------------------------------------------------------------------------------------------------------------------------------------------------------------------------------------------------------------------------------------------------------------------------------------------------------|
|                                                                                               | <p><b>1,4-naphthoquinone (31a)</b><br/> <sup>1</sup>H NMR (CDCl<sub>3</sub>, 300 MHz): δ = 13.21 (s, 1 H, α-OH), 13.06 (s, 1 H, α-OH), 6.77 (s, 1 H), 3.76 (t, <i>J</i> = 7.5 Hz, 2 H), 3.65 (t, <i>J</i> = 7.5 Hz, 2 H), 3.45 (t, <i>J</i> = 7.5 Hz, 2 H), 3.31 (t, <i>J</i> = 7.5 Hz, 2 H), 3.06 (q, <i>J</i> = 7.5 Hz, 2 H), 1.17 (t, <i>J</i> = 7.5 Hz, 3 H).<br/> <sup>13</sup>C NMR (CDCl<sub>3</sub>, 75 MHz): δ = 174.8, 173.8, 168.6, 166.2, 153.3, 149.1, 136.8, 125.4, 109.9, 109.6, 43.4, 40.5, 36.0, 32.5, 22.6, 13.5.</p> <p><b>3,6-di(2-chloroethylthio)-2-ethyl-5,8-dihydroxy-1,4-naphthoquinone (31b)</b><br/> <sup>1</sup>H NMR (CDCl<sub>3</sub>, 300 MHz): δ = 13.34 (s, 1 H, α-OH), 13.00 (s, 1 H, α-OH), 6.76 (s, 1 H), 3.76 (t, <i>J</i> = 7.5 Hz, 2 H), 3.65 (t, <i>J</i> = 7.5 Hz, 2 H), 3.51 (t, <i>J</i> = 7.5 Hz, 2 H), 3.31 (t, <i>J</i> = 7.5 Hz, 2 H), 3.03 (q, <i>J</i> = 7.5 Hz, 2 H), 1.16 (t, <i>J</i> = 7.5 Hz, 3 H).<br/> <sup>13</sup>C NMR (CDCl<sub>3</sub>, 75 MHz): δ = 174.5, 173.2, 167.9, 167.7, 150.4, 149.3, 139.6, 124.8, 110.3, 108.9, 43.5, 40.5, 36.0, 32.5, 22.4, 13.3.</p> |
| <p>32</p> 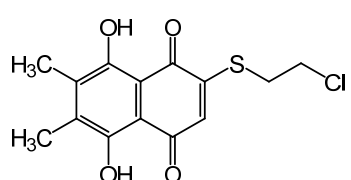  | <p><b>2-(2-Chloroethylthio)-5,8-dihydroxy-6,7-dimethyl-1,4-naphthoquinone</b> (obtained from 5,8-dihydroxy-2-(2-hydroxyethylthio)-6,7-dimethyl-1,4-naphthoquinone (<b>19</b>)):<br/> purple solid;<br/> yield: 120 mg (77%);<br/> mp 125-127°C.<br/> IR (CHCl<sub>3</sub>): 2927, 2856, 1733, 1715, 1601, 1555, 1457, 1391, 1300, 1267 cm<sup>-1</sup>.<br/> <sup>1</sup>H NMR (CDCl<sub>3</sub>, 300 MHz): δ = 13.09 (s, 1 H, α-OH), 13.07 (s, 1 H, α-OH), 6.79 (s, 1 H), 3.75 (t, <i>J</i> = 7.5 Hz, 2 H), 3.31 (t, <i>J</i> = 7.5 Hz, 2 H), 2.54 (s, 3 H).<br/> <sup>13</sup>C NMR (CDCl<sub>3</sub>, 75 MHz): δ = 172.6, 171.5, 171.1, 170.3, 147.8, 142.5, 140.3, 124.8, 109.7, 108.7, 40.8, 32.6, 12.7, 12.5.<br/> HRMS (ESI): <i>m/z</i> [M-H]<sup>-</sup> calcd for C<sub>14</sub>H<sub>12</sub>ClO<sub>4</sub>S: 311.0150; found: 311.0152.</p>                                                                                                                                                                                                                                                                        |
| <p>33</p>  | <p><b>2,3-di(2-chloroethylthio)-5,8-dihydroxy-6,7-dimethyl-1,4-naphthoquinone</b> (obtained from 5,8-dihydroxy-2,3-di(2-hydroxyethylthio)-6,7-dimethyl-1,4-naphthoquinone (<b>20</b>)):<br/> purple solid;<br/> yield: 132 mg (65%);<br/> mp 132-136°C.<br/> IR (CHCl<sub>3</sub>): 2928, 2856, 1600, 1445, 1392, 1379, 1297, 1270 cm<sup>-1</sup>.<br/> <sup>1</sup>H NMR (CDCl<sub>3</sub>, 300 MHz): δ = 13.51 (s, 2 H, 2 α-OH), 3.72 (t, <i>J</i> = 7.4 Hz, 4 H), 3.59 (t, <i>J</i> = 7.4 Hz, 4 H), 2.26 (s, 6 H, Me).<br/> <sup>13</sup>C NMR (CDCl<sub>3</sub>, 75 MHz): δ = 171.9, 170.1, 143.0, 141.3, 109.4, 43.5, 36.6, 12.5.<br/> HRMS (ESI): <i>m/z</i> [M-H]<sup>-</sup> calcd for C<sub>16</sub>H<sub>15</sub>Cl<sub>2</sub>O<sub>4</sub>S<sub>2</sub>: 406.3246; found: 406.3250.</p>                                                                                                                                                                                                                                                                                                                            |
| <p>34</p>  | <p><b>3-((2-chloroethylthio)methyl)-2-hydroxy-5,6,7-trimethoxy-1,4-naphthoquinone</b> (obtained from 2-hydroxy-3-((2-hydroxyethylthio)methyl)-5,6,7-trimethoxy-1,4-naphthoquinone (<b>24</b>)):<br/> yellow solid;<br/> yield: 158 mg (85%);<br/> mp 129-132°C.<br/> IR (CHCl<sub>3</sub>): 3410, 3001, 1704, 1655, 1578, 1483, 1466, 1418, 1374, 1334, 1294, 1143, 1102 cm<sup>-1</sup>.<br/> <sup>1</sup>H NMR (CDCl<sub>3</sub>, 300 MHz): δ = 7.48 (s, 1 H), 7.28 (br s, 1 H, β-OH), 4.00 (s, 3 H), 3.98 (s, 3 H), 3.93</p>                                                                                                                                                                                                                                                                                                                                                                                                                                                                                                                                                                                                 |

|    |                                                                                     |                                                                                                                                                                                                                                                                                                                                                                                                                                                                                                                                                                                                                                                                                                                                                                                                                                                                                                                                                                                                                                                                                                                                                                                                                |
|----|-------------------------------------------------------------------------------------|----------------------------------------------------------------------------------------------------------------------------------------------------------------------------------------------------------------------------------------------------------------------------------------------------------------------------------------------------------------------------------------------------------------------------------------------------------------------------------------------------------------------------------------------------------------------------------------------------------------------------------------------------------------------------------------------------------------------------------------------------------------------------------------------------------------------------------------------------------------------------------------------------------------------------------------------------------------------------------------------------------------------------------------------------------------------------------------------------------------------------------------------------------------------------------------------------------------|
|    |                                                                                     | <p>(s, 3 H), 3.72 (t, <math>J = 7.8</math> Hz, 2 H), 3.69 (s, 2 H), 2.92 (t, <math>J = 7.8</math> Hz, 2 H).</p> <p><b><math>^{13}\text{C}</math> NMR (<math>\text{CDCl}_3</math>, 75 MHz):</b> <math>\delta = 182.3, 180.7, 156.7, 154.8, 151.5, 149.8, 126.2, 121.8, 119.7, 106.2, 61.7, 61.4, 56.5, 42.9, 34.4, 23.5</math>.</p> <p><b>HRMS (ESI):</b> <math>m/z</math> <math>[\text{M}-\text{H}]^-</math> calcd for <math>\text{C}_{16}\text{H}_{17}\text{ClO}_6\text{S}</math>: 371.0361; found: 371.0364.</p>                                                                                                                                                                                                                                                                                                                                                                                                                                                                                                                                                                                                                                                                                             |
| 35 | 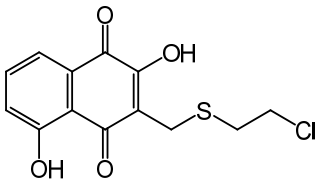   | <p><b>3-((2-chloroethylthio)methyl)-2,5-dihydroxy-1,4-naphthoquinone</b> (obtained from 2,5-dihydroxy-3-((2-hydroxyethylthio)methyl)-1,4-naphthoquinone (<b>22</b>)): yellow solid;</p> <p>yield: 114 mg (76%);</p> <p>mp 116-118 °C.</p> <p><b>IR (<math>\text{CHCl}_3</math>):</b> 3391, 3010, 1660, 1623, 1459, 1415, 1387, 1332, 1294, 1277, 1191, 1167, 1070 <math>\text{cm}^{-1}</math>.</p> <p><b><math>^1\text{H}</math> NMR (<math>\text{CDCl}_3</math>, 300 MHz):</b> <math>\delta = 12.27</math> (s, 1 H, <math>\alpha</math>-OH), 7.68 (dd, <math>J = 7.5, 1.0</math> Hz, 1 H), 7.65 (br s, 1 H, <math>\beta</math>-OH), 7.57 (t, <math>J = 7.5</math> Hz, 1 H), 7.32 (dd, <math>J = 7.5, 1.0</math> Hz, 1 H), 3.73 (t, <math>J = 7.8</math> Hz, 2 H), 3.71 (s, 2 H), 2.93 (t, <math>J = 7.8</math> Hz, 2 H).</p> <p><b><math>^{13}\text{C}</math> NMR (<math>\text{CDCl}_3</math>, 75 MHz):</b> <math>\delta = 189.6, 180.3, 161.6, 153.6, 135.4, 129.3, 126.7, 120.6, 119.7, 114.2, 42.8, 34.4, 22.9</math>.</p> <p><b>HRMS (ESI):</b> <math>m/z</math> <math>[\text{M}-\text{H}]^-</math> calcd for <math>\text{C}_{13}\text{H}_{10}\text{ClO}_4\text{S}</math>: 296.9996; found: 296.9994.</p> |
| 36 |  | <p><b>2-((2-chloroethylthio)methyl)-3,5-dihydroxy-1,4-naphthoquinone</b> (obtained from 3,5-dihydroxy-2-((2-hydroxyethylthio)methyl)-1,4-naphthoquinone (<b>23</b>)): yellow solid;</p> <p>yield: 117 mg (78%);</p> <p>mp 119-121 °C.</p> <p><b>IR (<math>\text{CHCl}_3</math>):</b> 3412, 3003, 1653, 1630, 1577, 1461, 1417, 1367, 1318, 1277, 1170 <math>\text{cm}^{-1}</math>.</p> <p><b><math>^1\text{H}</math> NMR (<math>\text{CDCl}_3</math>, 500 MHz):</b> <math>\delta = 11.05</math> (s, 1 H, <math>\alpha</math>-OH), 7.70-7.64 (m, 2 H), 7.52 (s, 1 H, <math>\beta</math>-OH), 7.23 (dd, <math>J = 8.0, 1.5</math> Hz, 1 H), 3.72 (t, <math>J = 7.6</math> Hz, 2 H), 3.71 (s, 2 H), 2.93 (t, <math>J = 7.6</math> Hz, 2 H).</p> <p><b><math>^{13}\text{C}</math> NMR (<math>\text{CDCl}_3</math>, 125 MHz):</b> <math>\delta = 184.3, 182.8, 161.5, 152.8, 138.0, 132.3, 123.6, 122.1, 120.0, 113.0, 42.8, 34.4, 23.4</math>.</p> <p><b>HRMS (ESI):</b> <math>m/z</math> <math>[\text{M}-\text{H}]^-</math> calcd for <math>\text{C}_{13}\text{H}_{10}\text{ClO}_4\text{S}</math>: 296.9994; found: 296.9994.</p>                                                                                 |
| 37 |  | <p><b>6,7-dichloro-2-((2-chloroethylthio)methyl)-3,5,8-trihydroxy-1,4-naphthoquinone</b> (obtained from 6,7-dichloro-2,5,8-trihydroxy-3-((2-hydroxyethylthio)methyl)-1,4-naphthoquinone (<b>21</b>)): red solid;</p> <p>yield: 139 mg (72%);</p> <p>mp 143-147 °C.</p> <p><b>IR (<math>\text{CHCl}_3</math>):</b> 3410, 3010, 1657, 1630, 1610, 1553, 1432, 1402, 1323, 1271, 1226, 1212, 1204, 1180, 1113 <math>\text{cm}^{-1}</math>.</p> <p><b><math>^1\text{H}</math> NMR (<math>\text{CDCl}_3</math>, 500 MHz):</b> <math>\delta = 13.34</math> (s, 1 H, <math>\alpha</math>-OH), 12.01 (s, 1 H, <math>\alpha</math>-OH), 7.55 (s, 1 H, <math>\beta</math>-OH), 3.74 (s, 2 H), 3.72 (t, <math>J = 7.8</math> Hz, 2 H), 2.94 (t, <math>J = 7.8</math> Hz, 2 H).</p> <p><b><math>^{13}\text{C}</math> NMR (<math>\text{CDCl}_3</math>, 125 MHz):</b> <math>\delta = 186.3, 180.7, 154.7</math> (2C), 153.7, 135.7, 131.7, 122.5, 108.9, 108.8, 42.7, 34.6, 23.0.</p> <p><b>HRMS (ESI):</b> <math>m/z</math> <math>[\text{M}-\text{H}]^-</math> calcd for <math>\text{C}_{13}\text{H}_8\text{Cl}_3\text{O}_5\text{S}</math>: 380.9163; found: 380.9165.</p>                                                  |

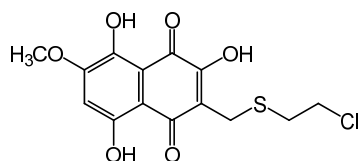

**2-((2-chloroethylthio)methyl)-3,5,8-trihydroxy-6-methoxy-1,4-naphthoquinone** (obtained from 3,5,8-trihydroxy-2-((2-hydroxyethylthio)methyl)-6-methoxy-1,4-naphthoquinone (**25**)):

red solid;

yield: 128 mg (74%);

mp 176-179 °C.

**IR (CHCl<sub>3</sub>):** 3523, 3411, 2942, 1602, 1478, 1436, 1413, 1396, 1354, 1323, 1304, 1274, 1217, 1210, 1196, 1178 cm<sup>-1</sup>.

**<sup>1</sup>H NMR (CDCl<sub>3</sub>, 300 MHz):** δ = 13.20 (s, 1 H, α-OH), 12.02 (s, 1 H, α-OH), 7.30 (s, 1 H, β-OH), 6.59 (s, 1 H), 3.98 (s, 3 H, OCH<sub>3</sub>), 3.75 (s, 2 H), 3.73 (t, *J* = 7.8 Hz, 2 H), 2.93 (t, *J* = 7.8 Hz, 2 H).

**<sup>13</sup>C NMR (CDCl<sub>3</sub>, 75 MHz):** δ = 181.5, 177.1, 164.0, 157.0, 155.4, 152.9, 122.8, 110.3, 109.4, 108.8, 56.7, 42.8, 34.4, 23.1.

**HRMS (ESI):** *m/z* [M-H]<sup>-</sup> calcd for C<sub>14</sub>H<sub>12</sub>ClO<sub>6</sub>S: 343.0048; found: 343.0051.

## BIOLOGY

### Cell culture conditions

Cells were incubated at 37°C in a humidified atmosphere with 5% (v/v) CO<sub>2</sub>. Cells were continuously kept in culture for a maximum of 3 months, and were routinely inspected microscopically for stable phenotype and regularly checked for contamination with mycoplasma.

PC-3, DU145, LNCaP, 22Rv1 and PNT2 cells were cultured in 10% FBS/RPMI medium (RPMI medium supplemented with Glutamax<sup>TM</sup>-I (Invitrogen, Paisley, UK) containing 10% fetal bovine serum (FBS, Invitrogen) and 1% penicillin/streptomycin (Invitrogen)). MRC-9, HEK 293 and VCaP cells were cultured in 10% FBS/DMEM medium (DMEM medium supplemented with Glutamax<sup>TM</sup>-I (Invitrogen) containing 10% FBS and 1% penicillin/streptomycin (Invitrogen)). RWPE-1 cells were cultured in Clonetics<sup>®</sup> EGM<sup>TM</sup>-2 SingleQuots<sup>®</sup> medium (Lonza, Walkersville, MD, USA) containing 10% FBS. HUVEC cells (passage 11) were cultured in Clonetics<sup>®</sup> EGM<sup>TM</sup>-2 SingleQuots<sup>®</sup> medium (Lonza, Walkersville, MD, USA) containing 10% FBS.

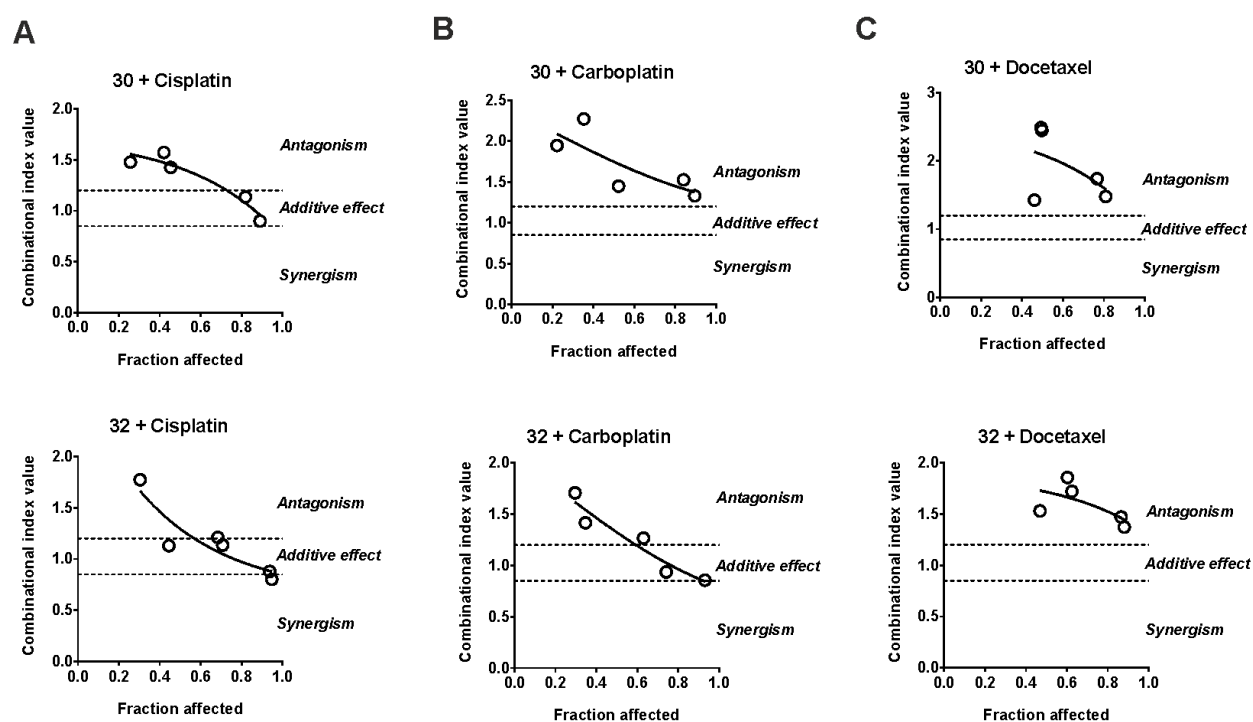

**Figure S1.** Effects of **30** and **32** on cell viability in combination with platinum or taxane agents.

22Rv1 cells were co-treated with indicated drug combinations for 48 h and the viability was evaluated using MTT viability assay and analyzed using Chou-Talalay method. Combinational index (CI) values were calculated using CompuSyn 1.0 software.

**Table S2.** Molar ratios of the individual drugs used for drug combinational studies.

|           |                          |            |
|-----------|--------------------------|------------|
| Figure 3H | <b>30</b> : Olaparib     | 0.6 : 100  |
|           | <b>32</b> : Olaparib     | 0.4 : 100  |
| Figure 4A | <b>30</b> : SB203580     | 0.5 : 200  |
|           | <b>30</b> : SCH772984    | 0.5 : 4    |
|           | <b>30</b> : PD98059      | 0.5 : 200  |
|           | <b>30</b> : GSK-690396   | 0.5 : 40   |
|           | <b>30</b> : GSK-SP600125 | 0.5 : 100  |
|           |                          |            |
| Figure 4C | <b>32</b> : SB203580     | 0.5 : 200  |
|           | <b>32</b> : SCH772984    | 0.5 : 4    |
|           | <b>32</b> : PD98059      | 0.5 : 200  |
|           | <b>32</b> : GSK-690396   | 0.5 : 40   |
|           | <b>32</b> : GSK-SP600125 | 0.5 : 100  |
|           |                          |            |
| Figure 5B | <b>30</b> : Enzalutamide | 0.6 : 100  |
|           | <b>32</b> : Enzalutamide | 0.4 : 100  |
| Figure S1 | <b>30</b> : Cisplatin    | 0.6 : 10   |
|           | <b>30</b> : Carboplatin  | 0.6 : 150  |
|           | <b>30</b> : Docetaxel    | 0.6 : 0.02 |
|           | <b>32</b> : Cisplatin    | 0.4 : 10   |
|           | <b>32</b> : Carboplatin  | 0.4 : 150  |
|           | <b>32</b> : Docetaxel    | 0.4 : 0.02 |
